# Supplementary material
Source: publisher figshare collection journal article supplement (https://geolsoc.figshare.com/ndownloader/files/34738168)

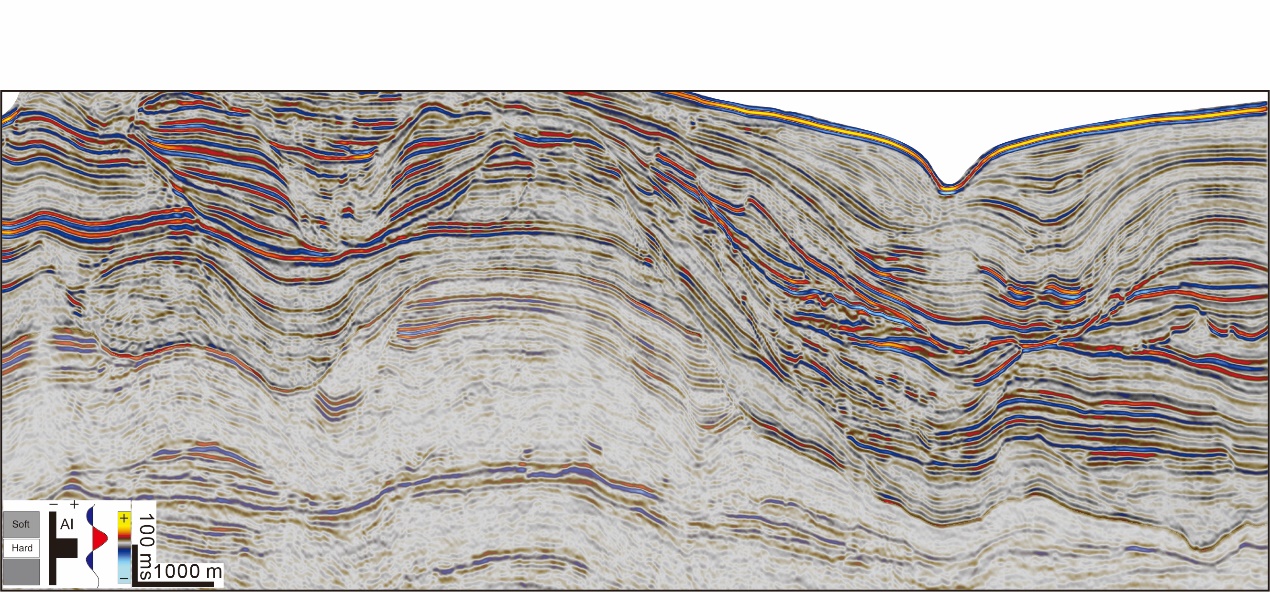


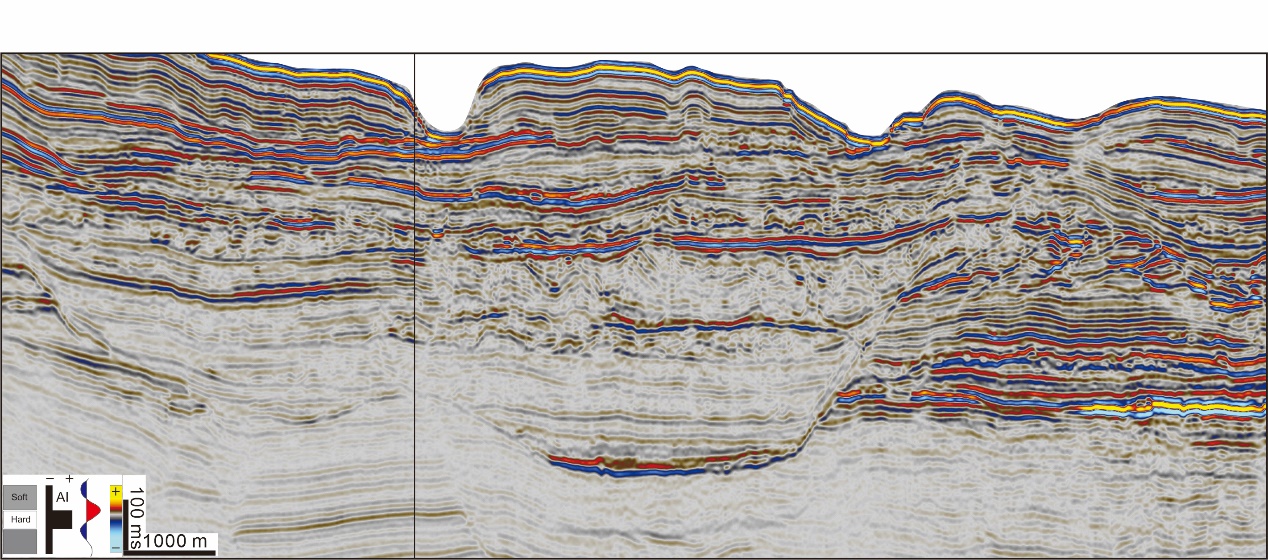


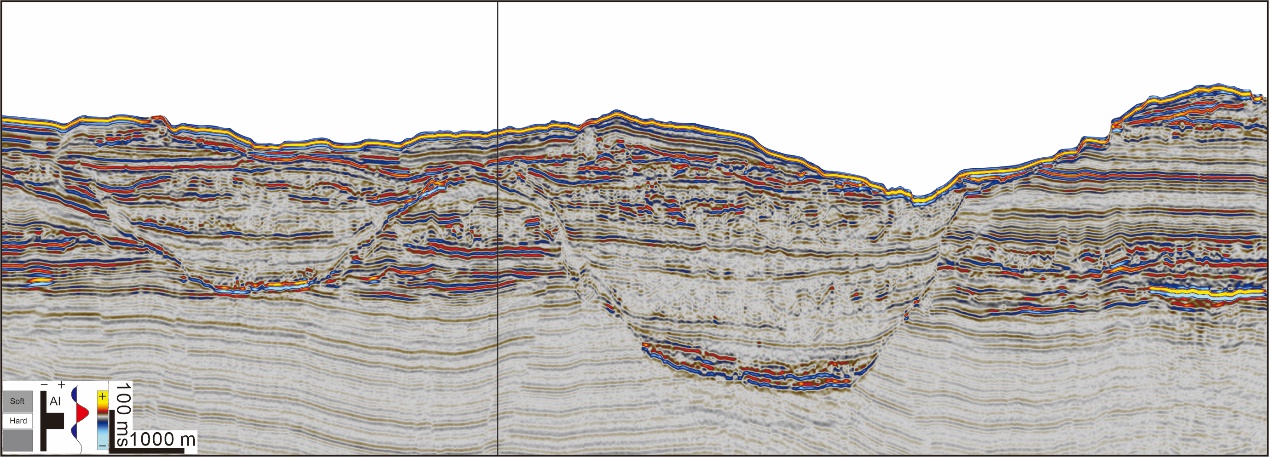

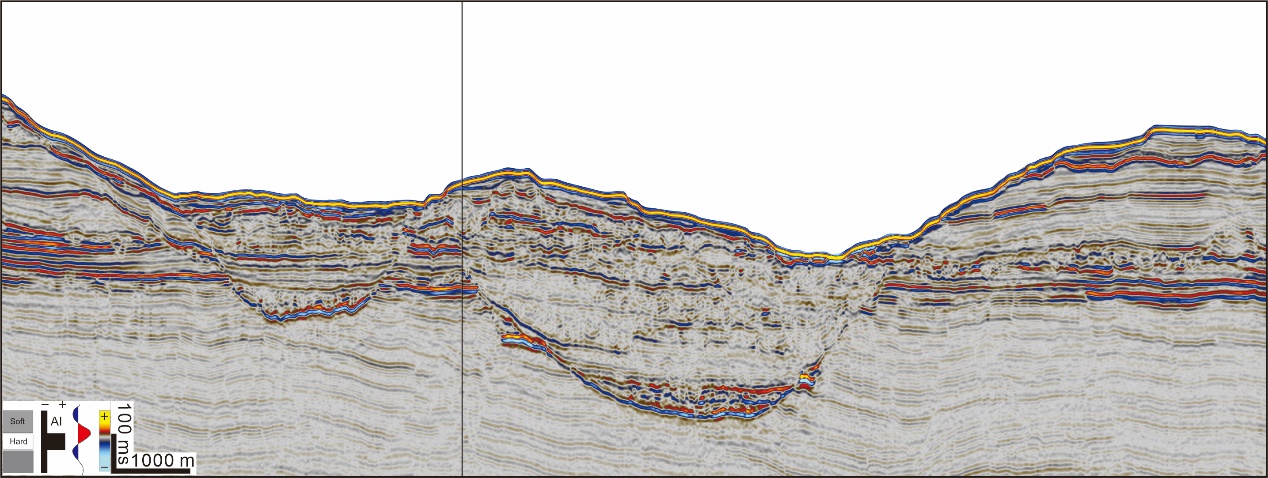


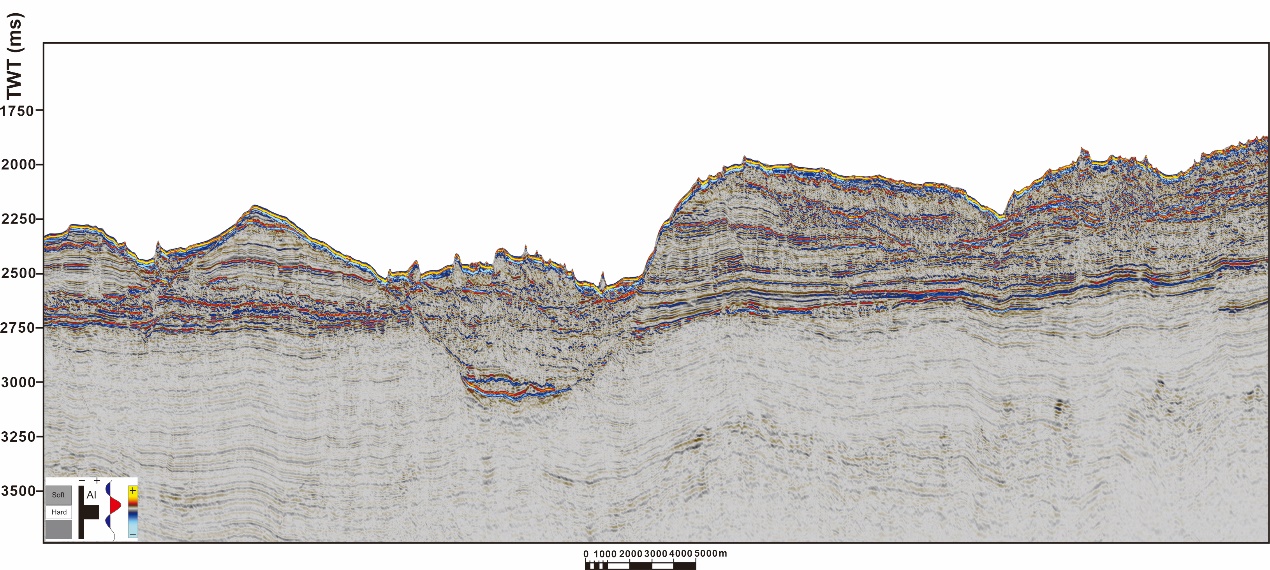

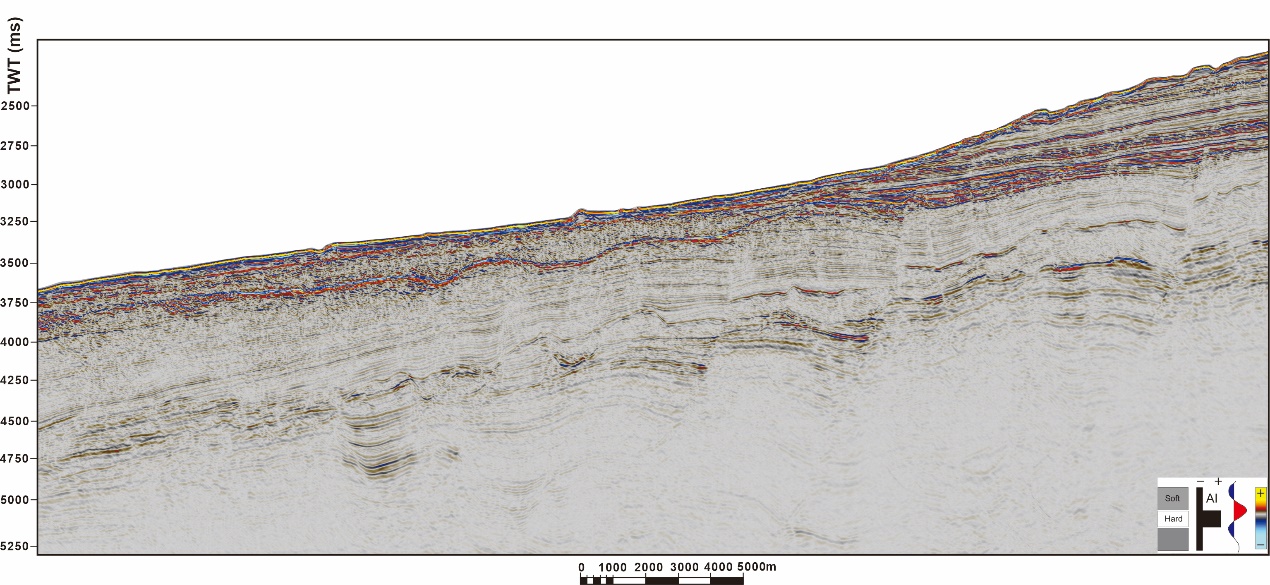


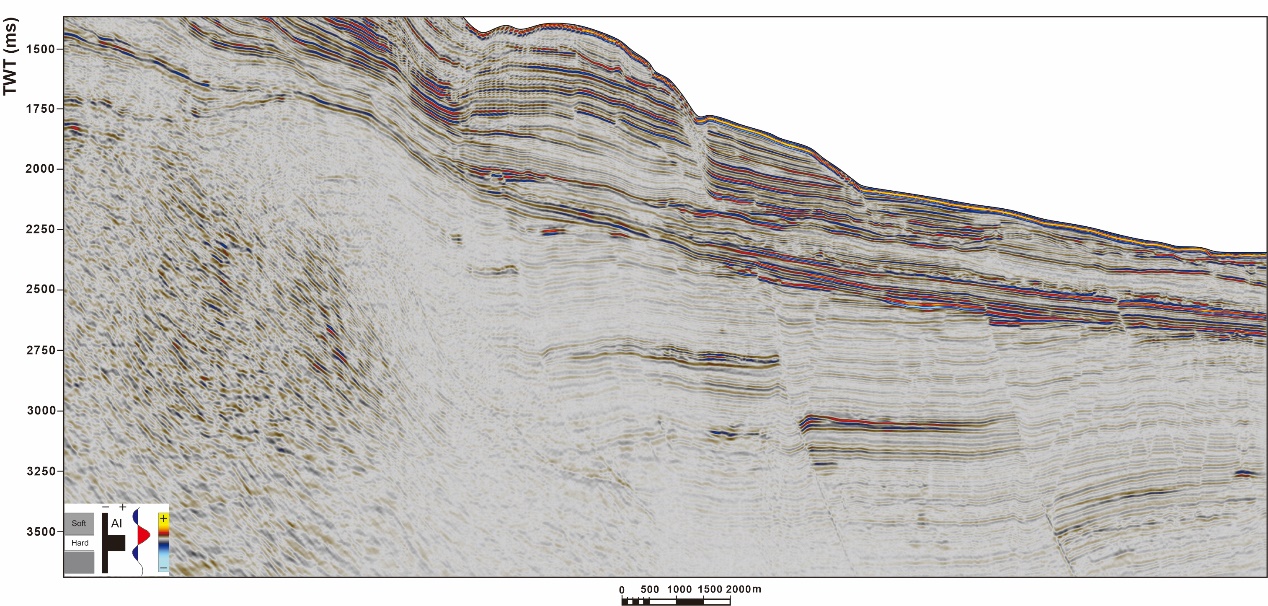

Supplement: Supplementary file 1 [file 34738168]
